# Supplementary material
Source: publisher site journal article supplement (https://www.dovepress.com/get_supplementary_file.php?f=481050.xlsx)
Supplement: Supplementary file 1 [file get_supplementary_file.php]

## Sheet: Table S1
Table S1 Antibiotic Resistance changes for Staphylococcus aureus, CoNS and Streptococcus pneumoniae between 2015-2018 and 2019-2022
	Penicillin G		Oxacillin		Levofloxacin		Clindamycin		Erythromycin		Vancomycin		Ceftriaxone		Moxifloxacin		Ampicillin/Sulbactam		Cefazolin		Cefuroxime		Gentamicin		Tobramycin		Rifampin		Trimethoprim/sulfamethoxazole		Fosfomycin		Linezolid		Teicoplanin
	2015-2018	2019-2022	2015-2018	2019-2022	2015-2018	2019-2022	2015-2018	2019-2022	2015-2018	2019-2022	2015-2018	2019-2022	2015-2018	2019-2022	2015-2018	2019-2022	2015-2018	2019-2022	2015-2018	2019-2022	2015-2018	2019-2022	2015-2018	2019-2022	2015-2018	2019-2022	2015-2018	2019-2022	2015-2018	2019-2022	2015-2018	2019-2022	2015-2018	2019-2022	2015-2018	2019-2022
Sta. aureus	90.2 (37/41)	91.2 (62/68)	34.1 (14/41)	16.2 (11/68)	26.8 (11/41)	10.3 (7/68)	34.1 (14/41)	14.7 (10/68)	58.5 (24/41)	54.4 (37/68)	0 (0/41)	0 (0/68)	NA	NA	NA	NA	19.5 (8/41)	4.5 (3/66)	24.4 (10/41)	10.6 (7/66)	19.5 (8/41)	12.1 (8/66)	25 (10/40)	11.8 (8/68)	34.1 (14/41)	19.4 (13/67)	12.5 (5/40)	0 (0/68)	2.4 (1/41)	1.5 (1/68)	7.3 (3/41)	1.5 (1/68)	0 (0/41)	0 (0/67)	0 (0/40)	0 (0/66)
CoNS	100 (9/9)	94.2 (49/52)	66.7 (6/9)	63.5 (33/52)	0 (0/9)	46.2 (24/52)	22.2 (2/9)	23.1 (12/52)	66.7 (6/9)	73.1 (38/52)	0 (0/9)	0 (0/51)	NA	NA	NA	NA	0 (0/9)	2.3 (1/43)	0 (0/9)	2.3 (1/43)	0 (0/9)	2.3 (1/43)	22.2 (2/9)	23.1 (12/52)	22.2 (2/9)	25 (13/52)	0 (0/9)	1.9 (1/52)	44.4 (4/9)	25 (13/52)	0 (0/9)	9.6 (5/52)	0 (0/9)	0 (0/52)	0 (0/9)	0 (0/43)
Str. pneumoniae	7.1 (2/28)	0 (0/68)	0 (0/28)	0 (0/68)	0 (0/28)	0 (0/68)	78.6 (22/28)	83.8 (57/68)	92.6 (25/27)	92.6 (63/68)	0 (0/28)	0 (0/68)	7.1 (2/28)	0 (0/68)	0 (0/28)	0 (0/67)	NA	NA	NA	NA	NA	NA	NA	NA	NA	NA	NA	NA	NA	NA	NA	NA	NA	NA	NA	NA
NA, Relevant data currently are not available or applicable.

## Sheet: Table S2
Table S2 Antibiotic Resistance changes for Pseudomonas aeruginosa, enterobacteriaceae and Haemophilus influenzae between 2015-2018 and 2019-2022
	Levofloxacin		Trimethoprim/sulfamethoxazole		Ciprofloxacin		Ampicillin/Sulbactam		Cefuroxime		Cefotaxime		Ampicillin		Azithromycin		Chloramphenicol		Piperacillin		Cefoperazone/Sulbactam		Piperacillin/Tazobactam		Ceftazidime		Cefepime		Aztreonam		Imipenem		Meropenem		Amikacin		Gentamicin		Tobramycin		Minocycline		Cefoperazone		Amoxicillin/Clavulanic acid		Cefazolin		Cefoxitin
	2015-2018	2019-2022	2015-2018	2019-2022	2015-2018	2019-2022	2015-2018	2019-2022	2015-2018	2019-2022	2015-2018	2019-2022	2015-2018	2019-2022	2015-2018	2019-2022	2015-2018	2019-2022	2015-2018	2019-2022	2015-2018	2019-2022	2015-2018	2019-2022	2015-2018	2019-2022	2015-2018	2019-2022	2015-2018	2019-2022	2015-2018	2019-2022	2015-2018	2019-2022	2015-2018	2019-2022	2015-2018	2019-2022	2015-2018	2019-2022	2015-2018	2019-2022	2015-2018	2019-2022	2015-2018	2019-2022	2015-2018	2019-2022	2015-2018
Ps. aeruginosa	0 (0/13)	8 (2/25)	92.3 (12/13)	100 (21/21)	0 (0/12)	8 (2/25)	NA	NA	NA	NA	NA	NA	NA	NA	NA	NA	NA	NA	0 (0/13)	0 (0/25)	0 (0/13)	0 (0/25)	0 (0/13)	0 (0/25)	0 (0/13)	4 (1/25)	0 (0/13)	4 (1/25)	0 (0/13)	8 (2/25)	0 (0/13)	0 (0/24)	7.7 (1/13)	0 (0/25)	7.7 (1/13)	0 (0/25)	7.7 (1/13)	8 (2/25)	7.7 (1/13)	4 (1/25)	69.2 (9/13)	71.4 (15/21)	0 (0/12)	4 (1/25)	NA	NA	NA	NA	NA
Enterobacteriaceae	27.3 (3/11)	35.3 (12/34)	45.5 (5/11)	41.2 (14/34)	54.5 (6/11)	50 (17/34)	36.4 (4/11)	26.5 (9/34)	40 (4/10)	39.4 (13/33)	36.4 (4/11)	33.3 (11/33)	100 (11/11)	97.1 (33/34)	NA	NA	NA	NA	50 (5/10)	55.8 (19/34)	18.2 (2/11)	11.8 (4/34)	0 (0/11)	8.8 (3/34)	27.3 (3/11)	23.5 (8/34)	36.4 (4/11)	26.5 (9/34)	45.5 (5/11)	26.5 (9/34)	0 (0/11)	8.8 (3/34)	0 (0/11)	8.8 (3/34)	0 (0/11)	14.7 (5/34)	18.2 (2/11)	38.2 (13/34)	18.2 (2/11)	32.4 (11/34)	NA	5.85 (1/17)	NA	NA	18.2 (2/11)	20.6 (7/34)	40 (4/10)	44.1 (15/34)	9.1 (1/11)
H. influenzae	0 (0/8)	0 (0/18)	37.5 (3/8)	61.1 (11/18)	0 (0/8)	0 (0/18)	0 (0/8)	0 (0/18)	12.5 (1/8)	22.2 (4/18)	0 (0/8)	0 (0/18)	37.5 (3/8)	50 (9/18)	0 (0/8)	38.9 (7/18)	0 (0/8)	0 (0/18)	NA	NA	NA	NA	NA	NA	NA	NA	NA	NA	NA	NA	NA	NA	NA	NA	NA	NA	NA	NA	NA	NA	NA	NA	NA	NA	NA	NA	NA	NA	NA
NA, Relevant data currently are not available or applicable.
[truncated: 3 more columns]
